# Supplementary material
Source: PubMed Central journal article supplement (PMC11072821)

**Table S1. List of RT-PCR primers**

| <b>PCR Primer</b> | <b>Sequence (5'-3')</b> | <b>Product size(bp)</b> |
|-------------------|-------------------------|-------------------------|
| ZBTB28F           | CTACGTCCGCGAGTTCACTC    | 170bp                   |
| ZBTB28R           | CCCGGAAAATTGAATAGAAG    |                         |
| VIMF              | TGCCAACCTTTACAGACCTA    | 390bp                   |
| VIMR              | CTCATCTCCCTCCTCACTCA    |                         |
| EcadF             | CCTCCGTTTCTGGAATCCAA    | 282bp                   |
| EcadR             | GTTCTCTATCCAGAGGCTCT    |                         |
| IFN $\alpha$ F    | GCCTCGCCCTTTGCTTTACT    | 89bp                    |
| IFN $\alpha$ R    | CTGTGGGTCTCAGGGAGATCA   |                         |
| IFN $\beta$ F     | GCTTGGATTCTACAAAGAAGCA  | 166bp                   |
| IFN $\beta$ R     | ATAGATGGTCAATGCGGCGTC   |                         |
| IFN $\gamma$ F    | TCGGTAACTGACTTGAATGTCCA | 93bp                    |
| IFN $\gamma$ R    | TCGCTTCCCTGTTTTAGCTGC   |                         |
| IFNL1F            | CACATTGGCAGGTTCAAATCTCT | 386bp                   |
| IFNL1R            | CCAGCGGACTCCTTTTTGG     |                         |
| IFNL3F            | TAAGAGGGCCAAAGATGCCTT   | 205bp                   |
| IFNL3R            | CTGGTCCAAGACATCCCCC     |                         |
| SIRP $\alpha$ F   | GCCCTCTACCTCGTCCGAAT    | 193bp                   |
| SIRP $\alpha$ R   | CATACTCCGTGTGGTTGTTGG   |                         |
| Siglec10F         | AAGGGACTCATCTCAACGGC    | 114bp                   |
| Siglec10R         | CCGTCTCTTCGGTAGAATCTTCA |                         |
| $\beta$ -actinF   | TCCTGTGGCATCCACGAACT    | 315bp                   |
| $\beta$ -actinR   | GAAGCATTGCGGTGGACGAT    |                         |

**Table S2. List of qRT-PCR Primers**

| PCR Primer      | Sequence (5'-3')         | Product size (bp) | Annealing temperature (°C) |
|-----------------|--------------------------|-------------------|----------------------------|
| iNOSF           | CAGGATGACCTTCAGTATCACACA | 106bp             | 60                         |
| iNOSR           | CATCCAGCTTGACCAGAGAT     |                   |                            |
| CD80F           | AAACTCGCATCTACTGGCAAA    | 87bp              | 60                         |
| CD80R           | GGTTCTTGTACTCGGGCCATA    |                   |                            |
| CD86F           | CTGCTCATCTATACACGGTTACC  | 133bp             | 60                         |
| CD86R           | GGAAACGTCGTACAGTTCTGTG   |                   |                            |
| CD40F           | ACTGAAACGGAATGCCTTCCT    | 181bp             | 60                         |
| CD40R           | CCTCACTCGTACAGTGCCA      |                   |                            |
| IL-1bF          | ACAGTGGCAATGAGGATG       | 129bp             | 60                         |
| IL-1bR          | TGTAGTGGTGGTCCGAGA       |                   |                            |
| ARG1F           | GTGGAAACTTGCATGGACAAC    | 76bp              | 60                         |
| ARG1R           | AATCCTGGCACATCGGGAATC    |                   |                            |
| MRC1F           | TCCGGGTGCTGTTCTCCTA      | 211bp             | 60                         |
| MRC1R           | CCAGTCTGTTTTTGATGGCACT   |                   |                            |
| IL-10F          | GCCAAGCCTTGTCTGAGATGA    | 80bp              | 60                         |
| IL-10R          | CTTGATGTCTGGGTCTTGGTTCT  |                   |                            |
| IFNAR1F         | ATTTACACCATTTTCGCAAAGCTC | 120bp             | 60                         |
| IFNAR1R         | TCCAAAGCCACATAAACTATC    |                   |                            |
| IFNAR2F         | TCATGGTGTATATCAGCCTCGT   | 143bp             | 60                         |
| IFNAR2R         | AGTTGGTACAATGGAGTGGTTTT  |                   |                            |
| qRT-PCR IFNGR1F | AGCAGGAAGTCGATTATGATCCC  | 137bp             | 60                         |
| IFNGR1R         | CTGGCACTGAATCTCGTCACA    |                   |                            |
| IFNGR2F         | CTCCTCAGCACCCGAAGATTC    | 136bp             | 60                         |
| IFNGR2R         | GCCGTGAACCATTTACTGTCG    |                   |                            |
| IFIT1F          | AGCCATTTTCTTTGCTTCCC     | 205bp             | 60                         |
| IFIT1R          | ACAGAGCCTTTTCTTCGGTA     |                   |                            |
| IFIT2F          | AAGCACCTCAAAGGGCAAAAC    | 147bp             | 60                         |
| IFIT2R          | TCGGCCCATGTGATAGTAGAC    |                   |                            |
| IFIT3F          | GGAAACTACGCTGGGTC        | 180bp             | 60                         |
| IFIT3R          | CACCTTCGCCCTTTCATT       |                   |                            |
| OAS1F           | CTGACCTGGTTGTCTTCC       | 137bp             | 60                         |
| OAS1R           | GACCTCAAACCTTCACGGA      |                   |                            |
| OAS2F           | TGAAGCCCTACGAAGAAT       | 176bp             | 60                         |
| OAS2R           | ACTGAAGAAGAGGACAAGG      |                   |                            |
| OAS3F           | GAAGGAGTTCGTAGAGAAGGCG   | 114bp             | 60                         |
| OAS3R           | CCCTTGACAGTTTTTCAGCACC   |                   |                            |
| SAMD9LF         | GCTAGAAGCTCTGAGAGCAGA    | 116bp             | 60                         |
| SAMD9LR         | TGCTGCAGTAGGAAGGCATA     |                   |                            |
| XAF1F           | GTTGGGTGTACGATGTGTCA     | 200bp             | 60                         |

---

|      |                  |                         |       |    |
|------|------------------|-------------------------|-------|----|
|      | XAF1R            | ATGCGGTGCATGATGAACTG    |       |    |
|      | RARRES3F         | ATGGCTACGTGATCCATCTG    | 151bp | 60 |
|      | RARRES3R         | AAGCTGTTGTTGACCCGATAG   |       |    |
|      | ASCL1F           | AACTTCAGCGGCTTTGGCTAC   | 302bp | 60 |
|      | ASCL1R           | ATGGAGTTCAAGTCGTTGGAG   |       |    |
|      | CD24F            | AAGTAACTCCTCCCAGAGTACT  | 120bp | 60 |
| qRT- | CD24R            | GAGAGAGTGAGACCACGAAG    |       |    |
| PCR  | CD47F            | CCAGAGAAGG TGAAACGATC   | 122bp | 60 |
|      | CD47R            | AAACTGTCCCCAGAACAGGA    |       |    |
|      | IFN $\beta$ F    | ATGACCAACAAGTGTCTCCTCC  | 88bp  | 60 |
|      | IFN $\beta$ R    | GGAATCCAAGCAAGTTGTAGCTC |       |    |
|      | $\beta$ -actinF1 | GTCTTCCCCTCCATCGTG      | 113bp | 60 |
|      | $\beta$ -actinR1 | AGGGTGAGGATGCCTCTCTT    |       |    |

---

**Table S3. List of ChIP-PCR Primers**

| <b>Primer</b>  | <b>Sequence (5'-3')</b> | <b>Product size (bp)</b> | <b>Annealing temperature (°C)</b> |
|----------------|-------------------------|--------------------------|-----------------------------------|
| chip IFNAR1 F  | AAAGTGGTGTCTGGGTCCT     | 249bp                    | 60                                |
| chip IFNAR1 R  | AATCCTGGCCACACTTAGCT    |                          |                                   |
| chip IFNAR2 F1 | CAAACTGCACTTGTACCCC     | 99bp                     | 60                                |
| chip IFNAR2 R1 | AAGTGATCTGAAGATGAAGGCA  |                          |                                   |
| chip IFNAR2 F2 | GCAGGAAGTCGCAAACATCAT   | 232bp                    | 60                                |
| chip IFNAR2 R2 | GAGGAAGAAAGCGTGTTAGGAG  |                          |                                   |
| chip IFNAR2 F3 | CTCCTAACACGCTTTCTTCCTC  | 131bp                    | 60                                |
| chip IFNAR2 R3 | GGAATGTCCTCAGAGGCAATTG  |                          |                                   |
| chip CD24 F1   | GCCGCGTTCCCCTTTCTCTCT   | 226bp                    | 60                                |
| chip CD24 R1   | TTTCCCGGGACCTGCCATCTTA  |                          |                                   |
| chip CD24 F2   | TAAGATGGCAGGTCCCGGAAA   | 164bp                    | 60                                |
| chip CD24 R2   | TGCTGGTACCCGGCTGGTAT    |                          |                                   |
| chip CD24 F3   | ATACCAGCCGGGTACCAGCA    | 221bp                    | 60                                |
| chip CD24 R3   | AAAGCCACAATAGCCGTGACGT  |                          |                                   |
| chip CD24 F4   | ACGTCACGGCTATTGTGGCTTT  | 161bp                    | 60                                |
| chip CD24 R4   | CACCATTGCTCTGCCCATGT    |                          |                                   |
| chip CD24 F5   | ACATGGGCAGAGCAATGGTG    | 200bp                    | 60                                |
| chip CD24 R5   | AAGATTCTCTCCCGGTCCCT    |                          |                                   |
| chip CD47 F1   | ATGCCTGTTTGCGACAATGCTC  | 172bp                    | 60                                |
| chip CD47 R1   | TACTCGTCTGCTCTTCCCTAT   |                          |                                   |
| chip CD47 F2   | ATAGGGAAGAGCAGAGCGAGTA  | 185bp                    | 60                                |
| chip CD47 R2   | GACACCTAGGCTTTCACCA     |                          |                                   |
| chip CD47 F3   | TGGTGAAAGCCTAGGTGTC     | 150bp                    | 60                                |
| chip CD47 R3   | CCACTGTCTCTCTCTACTT     |                          |                                   |
| chip CD47 F4   | AAGTAGAGAGAGAGGACAGTGG  | 177bp                    | 60                                |
| chip CD47 R4   | TTCCAGGTCACGTCCTGT      |                          |                                   |
| chip CD47 F5   | ACAGGACGTGACCTGGAA      | 257bp                    | 60                                |
| chip CD47 R5   | TCACAGGCAGGACCCACT      |                          |                                   |
| chip CD47 F6   | AGTGGGTCCTGCCTGTGA      | 178bp                    | 60                                |
| chip CD47 R6   | TTCTCTTCCCTCTTCTCACCG   |                          |                                   |

**Table S4.** *ZBTB28* methylation and clinicopathological features of breast tumors

| Clinicopathological features | Number<br>( <i>n</i> =174) | Methylated status |              | <i>p</i><br>value |
|------------------------------|----------------------------|-------------------|--------------|-------------------|
|                              |                            | methylated        | unmethylated |                   |
| <b>Age</b>                   |                            |                   |              |                   |
| <45                          | 57                         | 36                | 21           | <b>0.032</b>      |
| ≥45                          | 116                        | 91                | 25           |                   |
| Unknown                      | 1                          | 1                 |              |                   |
| <b>Tumor size</b>            |                            |                   |              |                   |
| ≤5.0 cm                      | 142                        | 108               | 34           | 0.125             |
| >5.0 cm                      | 17                         | 10                | 7            |                   |
| Unknown                      | 15                         | 10                | 5            |                   |
| <b>Stage (AJCC)</b>          |                            |                   |              |                   |
| I-II                         | 112                        | 84                | 28           | 0.840             |
| III-IV                       | 51                         | 39                | 12           |                   |
| Unknown                      | 11                         | 5                 | 6            |                   |
| <b>Lymph node metastasis</b> |                            |                   |              |                   |
| Positive                     | 84                         | 58                | 26           | 0.205             |
| Negative                     | 81                         | 63                | 18           |                   |
| Unknown                      | 9                          | 7                 | 2            |                   |
| <b>Distant metastasis</b>    |                            |                   |              |                   |
| Positive                     | 4                          | 3                 | 1            | 0.670             |
| Negative                     | 125                        | 90                | 35           |                   |
| Unknown                      | 45                         | 35                | 10           |                   |
| <b>ER</b>                    |                            |                   |              |                   |
| Positive                     | 87                         | 59                | 28           | 0.162             |
| Negative                     | 72                         | 56                | 16           |                   |
| Unknown                      | 15                         | 13                | 2            |                   |
| <b>PR</b>                    |                            |                   |              |                   |
| Positive                     | 70                         | 47                | 23           | 0.263             |
| Negative                     | 85                         | 64                | 21           |                   |
| Unknown                      | 19                         | 17                | 2            |                   |
| <b>HER2</b>                  |                            |                   |              |                   |
| Positive                     | 115                        | 83                | 32           | 0.956             |
| Negative                     | 46                         | 33                | 13           |                   |
| Unknown                      | 13                         | 12                | 1            |                   |
| <b>P53</b>                   |                            |                   |              |                   |
| Positive                     | 80                         | 58                | 22           | 0.908             |
| Negative                     | 67                         | 48                | 19           |                   |
| Unknown                      | 27                         | 22                | 5            |                   |
| <b>Ki-67</b>                 |                            |                   |              |                   |
| Positive                     | 135                        | 100               | 35           | 0.883             |
| Negative                     | 9                          | 7                 | 2            |                   |
| Unknown                      | 30                         | 21                | 9            |                   |

### **Figure S1.**

(A, B) Down-regulated *ZBTB28* mRNA expression and methylation of *ZBTB28* promoter were accessed via The Cancer Genome Atlas and MethHC databases. (C) Multiple targeted bisulfite enrichment sequencing (MethTarget) of 5 BrCa cases and 9 controls. (D) Cells were exposed to demethylating agent 5-Aza. *ZBTB28* expression was detected with qRT-PCR and demethylation was measured by qMSP. (E) The relationship between *ZBTB28* methylation and survival of breast cancer patients were illustrated through Survivalmeth database.

### **Figure S2.**

(A) For colony formation assay, pictures were taken on the 14th day. (B) Representative pictures of AO/EB staining assay. (C) Flow cytometry analysis of cell cycle. (D) The localization of *ZBTB28* and E-cad or Vimentin in the nucleus of MB231 was analyzed by immunofluorescence. (E) Phase contrast microscopy obtained the changes of morphological for gain-of-function breast cancer cell lines. (F) Pictures were taken at 24h after seeding during transwell assay. (G) Photographs were captured at 0 h and 24 h, then the ratio of wound healing was calculated.

\* $p < 0.05$ , \*\* $p < 0.01$ , \*\*\* $p < 0.001$ .

### **Figure S3.**

(A) 48 hours after transfection with si*ZBTB28* or control siRNA, the expression of *ZBTB28* were evaluated by RT-PCR.  $\beta$ -actin was used as control. (B) BT549 cells were transfected with si*ZBTB28* and control siRNA. Cell viability was assessed by CCK8 assay. (C, D) Pictures were taken at 48 h after transfecting, the relative ratio of

migration and invasion cells per field was shown.

\* $p < 0.05$ , \*\* $p < 0.01$ , \*\*\* $p < 0.001$ .

#### **Figure S4.**

(A) RT-PCR results of the regulation of IFNs by ZBTB28. (B) qRT-PCR confirmed that ZBTB28 upregulated IFN- $\gamma$ . (C) Ectopic expression of ZBTB28 in breast cancer cells influenced the expression of IFNGR1 and IFNGR2. (D) Cancer cells were pretreatment with/without anti-IFNGR2 mAb for 8 hours, then co-culture with THP-1 macrophages for another 24 hours. Protein levels of IFNGR2 and IFN- $\gamma$  were measured by western blotting;  $\beta$ -actin was used as a loading control.

#### **Figure S5.**

(A) Association of *ZBTB28* and *BCL6* expression in breast cancer which was obtained from TCGA cancer dataset ([www.cbioportal.org](http://www.cbioportal.org)). (B, C) qRT-PCR of CD24 or CD47 mRNA in MCF7 and MB231 underwent with pcDNA 3.1, pcDNA-ZBTB28, siRNA of BCL6, and pcDNA-ZBTB28 with or without siRNA of BCL6. (D) The expression of CD24 and CD47 was detected by qRT-PCR in BCL6-overexpression, ZBTB28-overexpression, BCL6+ZBTB28 overexpression and control group in K562 cells. (E) The expression of SIRP $\alpha$  and Siglec10 were detected by RT-PCR in THP-1 cells and PMA treated THP-1 macrophages.

#### **(B) Figure S6.**

(A) Representative flow-cytometry plots of the phagocytosis of MCF7 cells treated with different treatment. (B) Phagocytosis efficiency was shown as a bar graph. (C) Phagocytosis images of THP-1 macrophages engulfing MCF7 cells. The white arrows

indicate macrophages that engulfed cancer cells.

**Figure S7.**

(A, B) Representative plots showed the percentage of THP-1 macrophages phagocytosing cancer cells in vitro. (C) Statistical analysis was shown as a bar graph.



Figure S1.

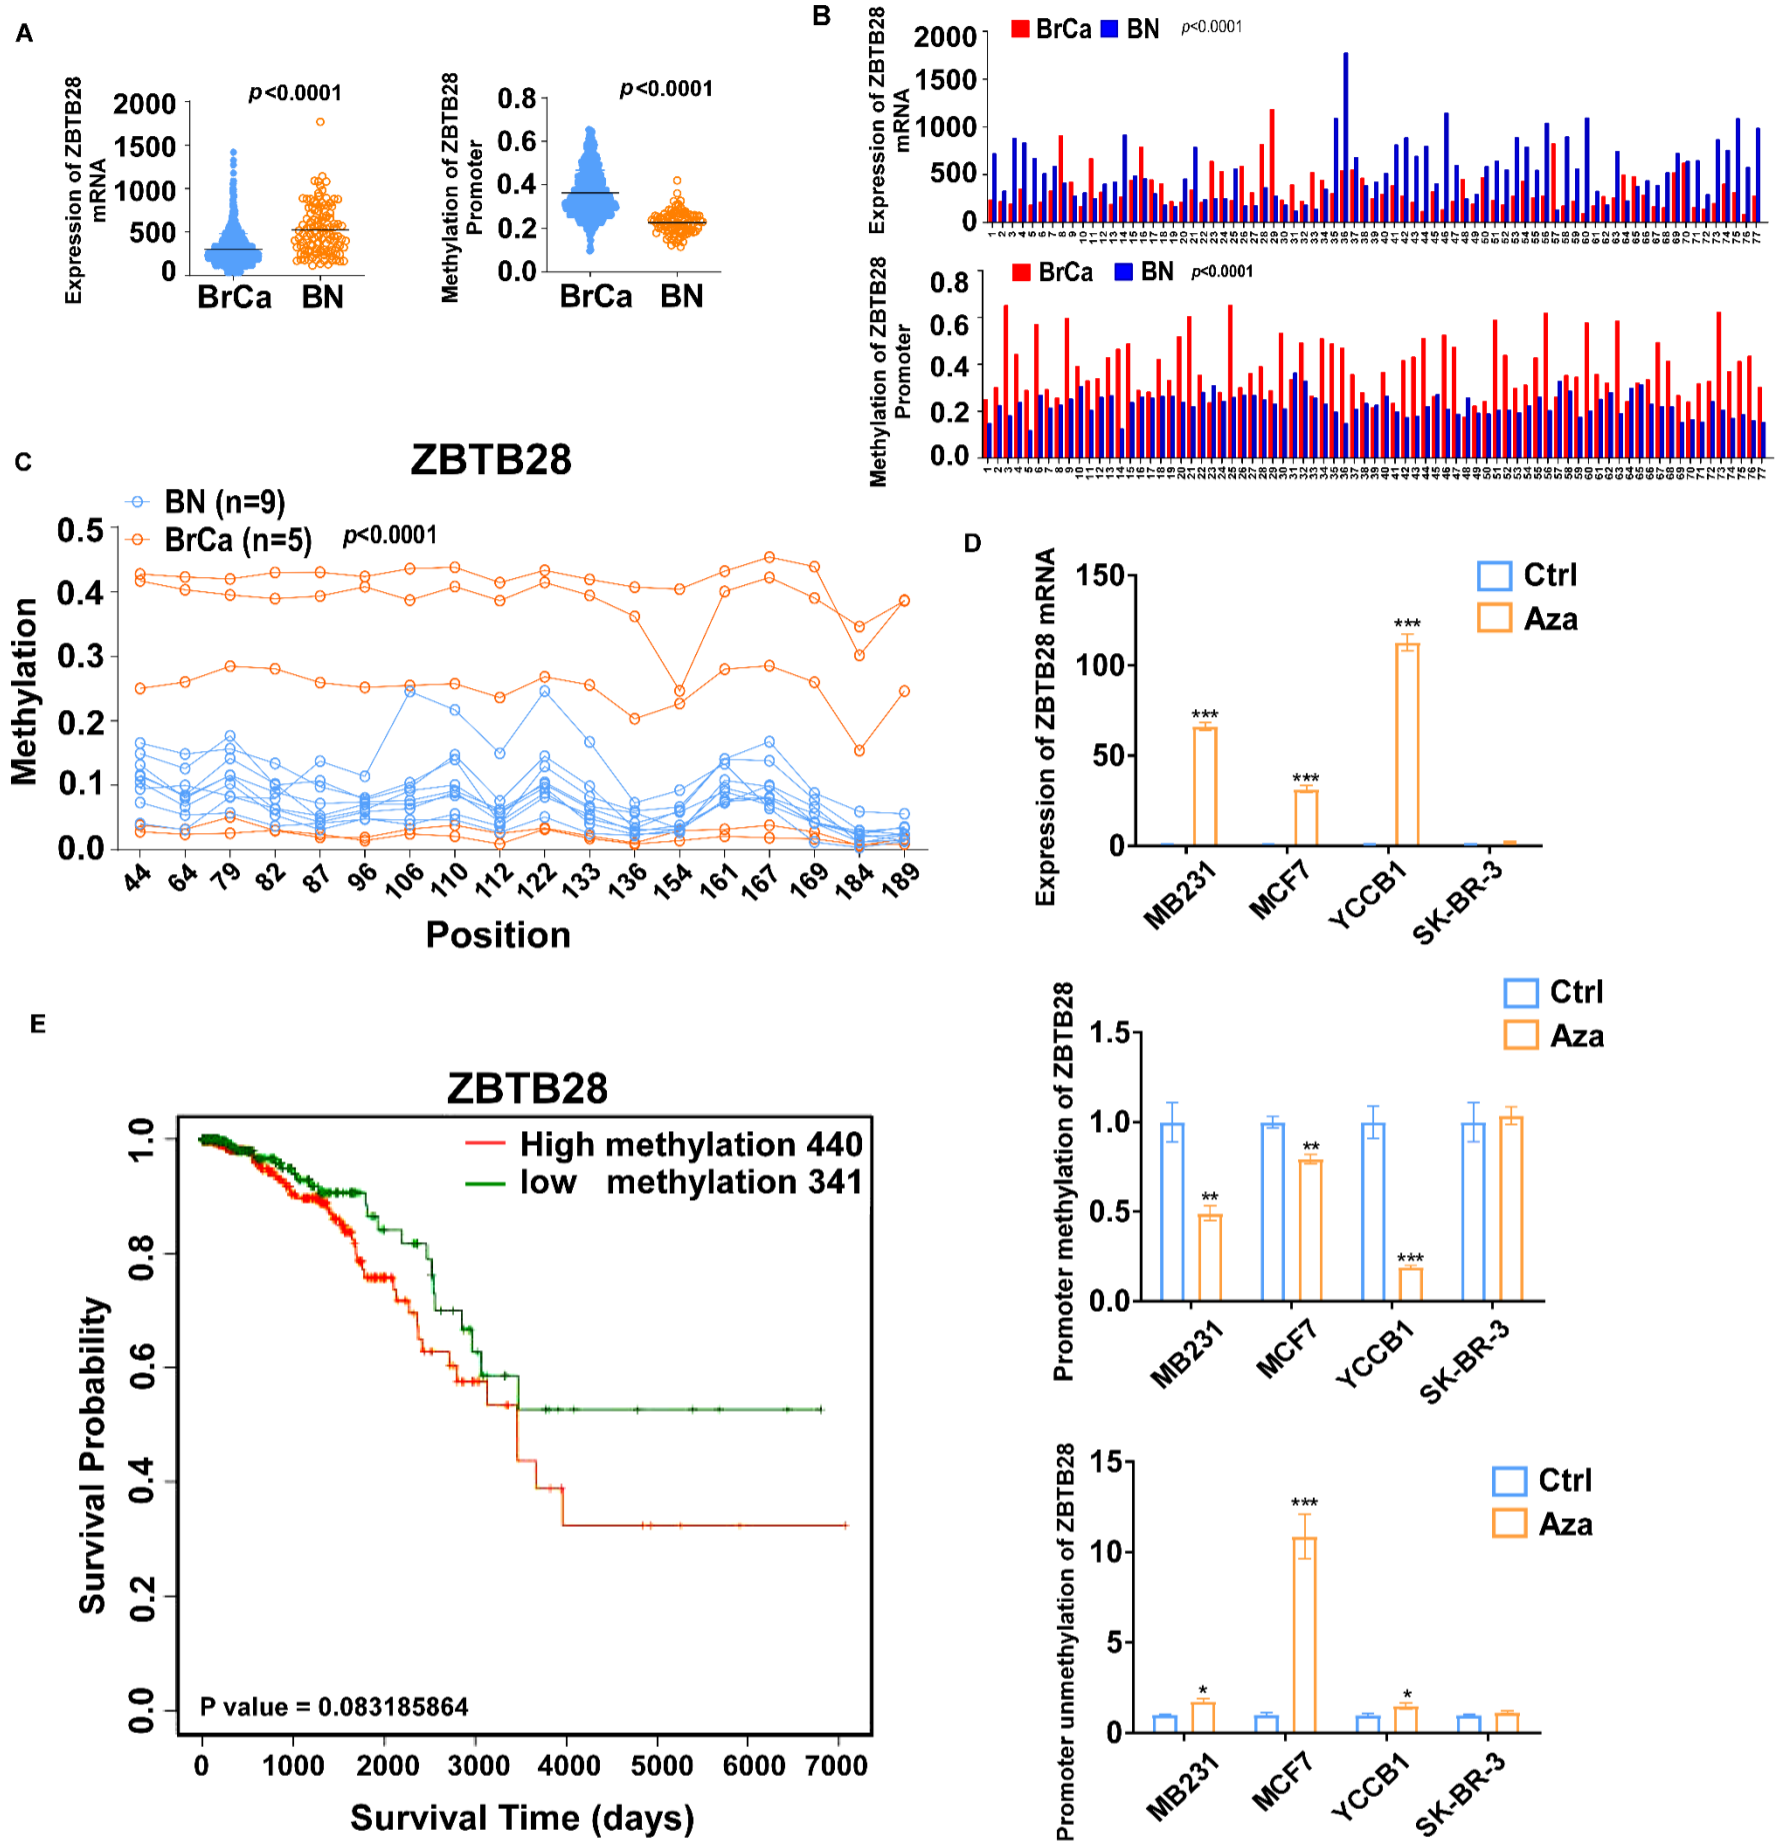

Figure S2.

**A**

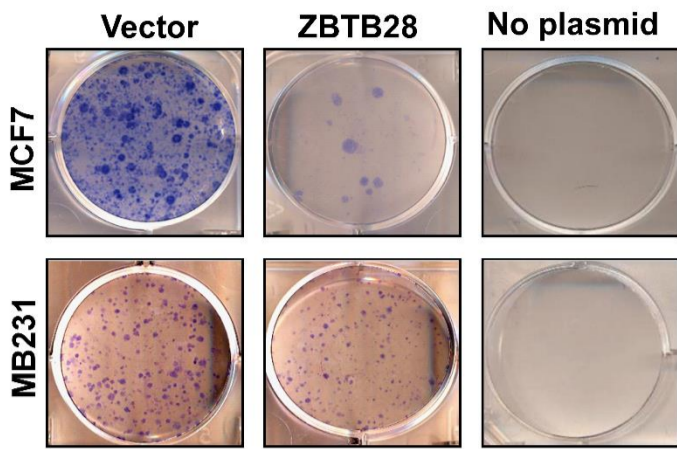

**B**

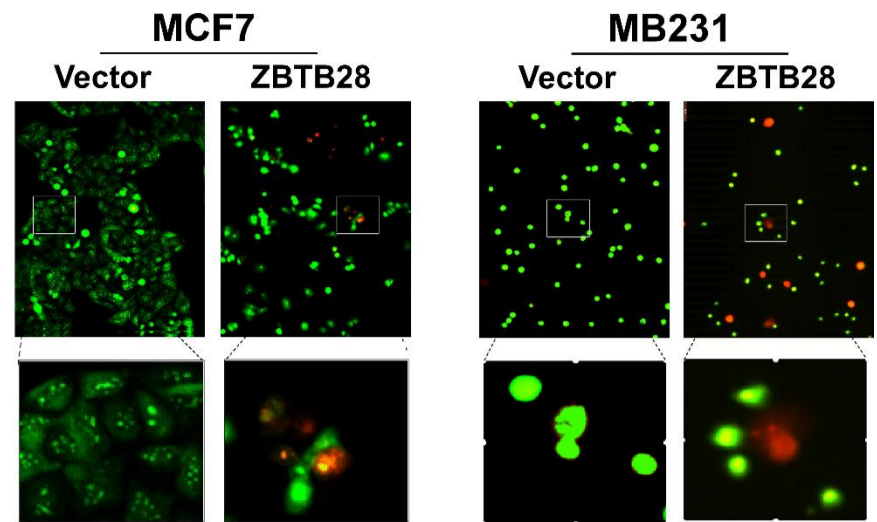

**C**

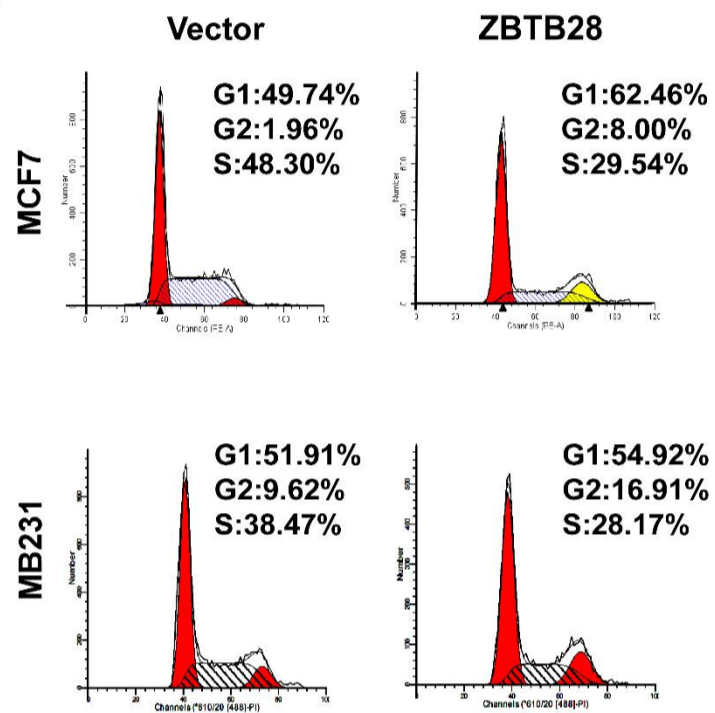

**D**

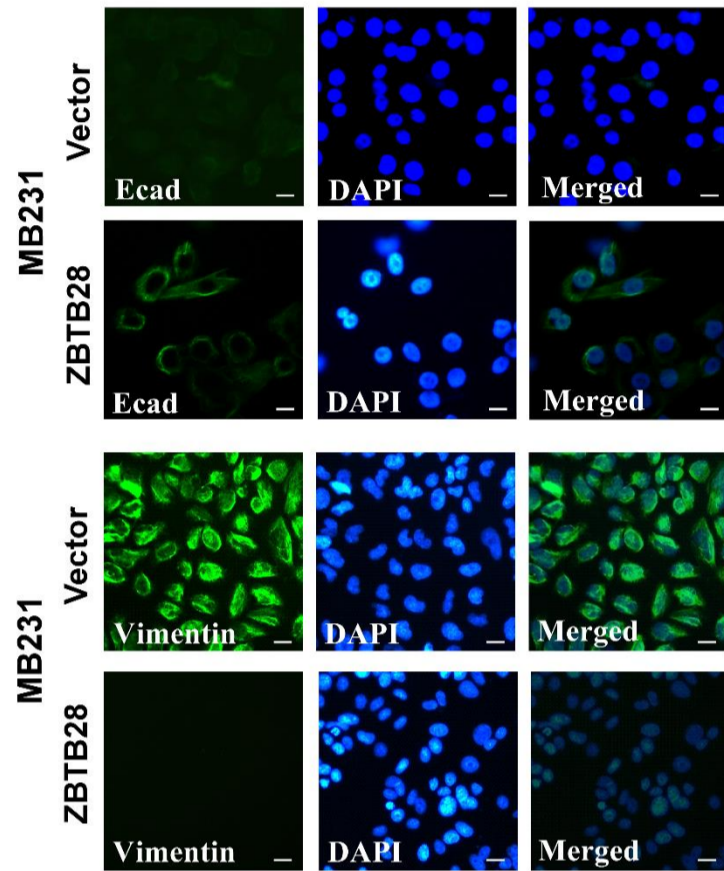

**E**

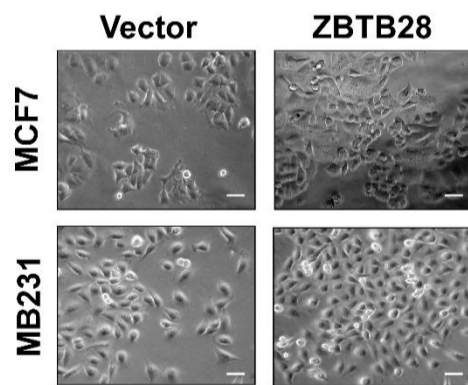

**F**

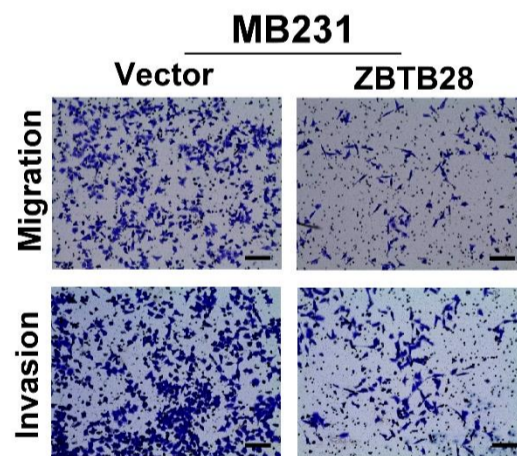

**G**

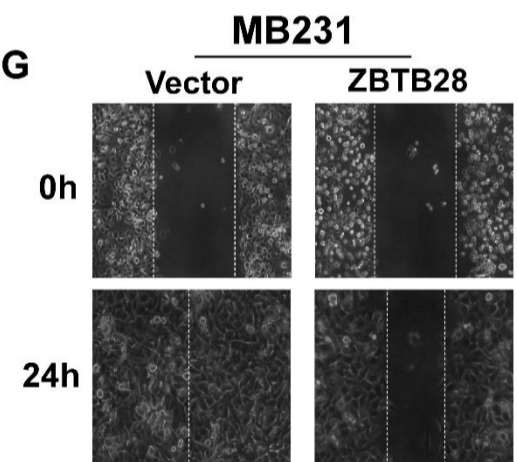

Figure S3.

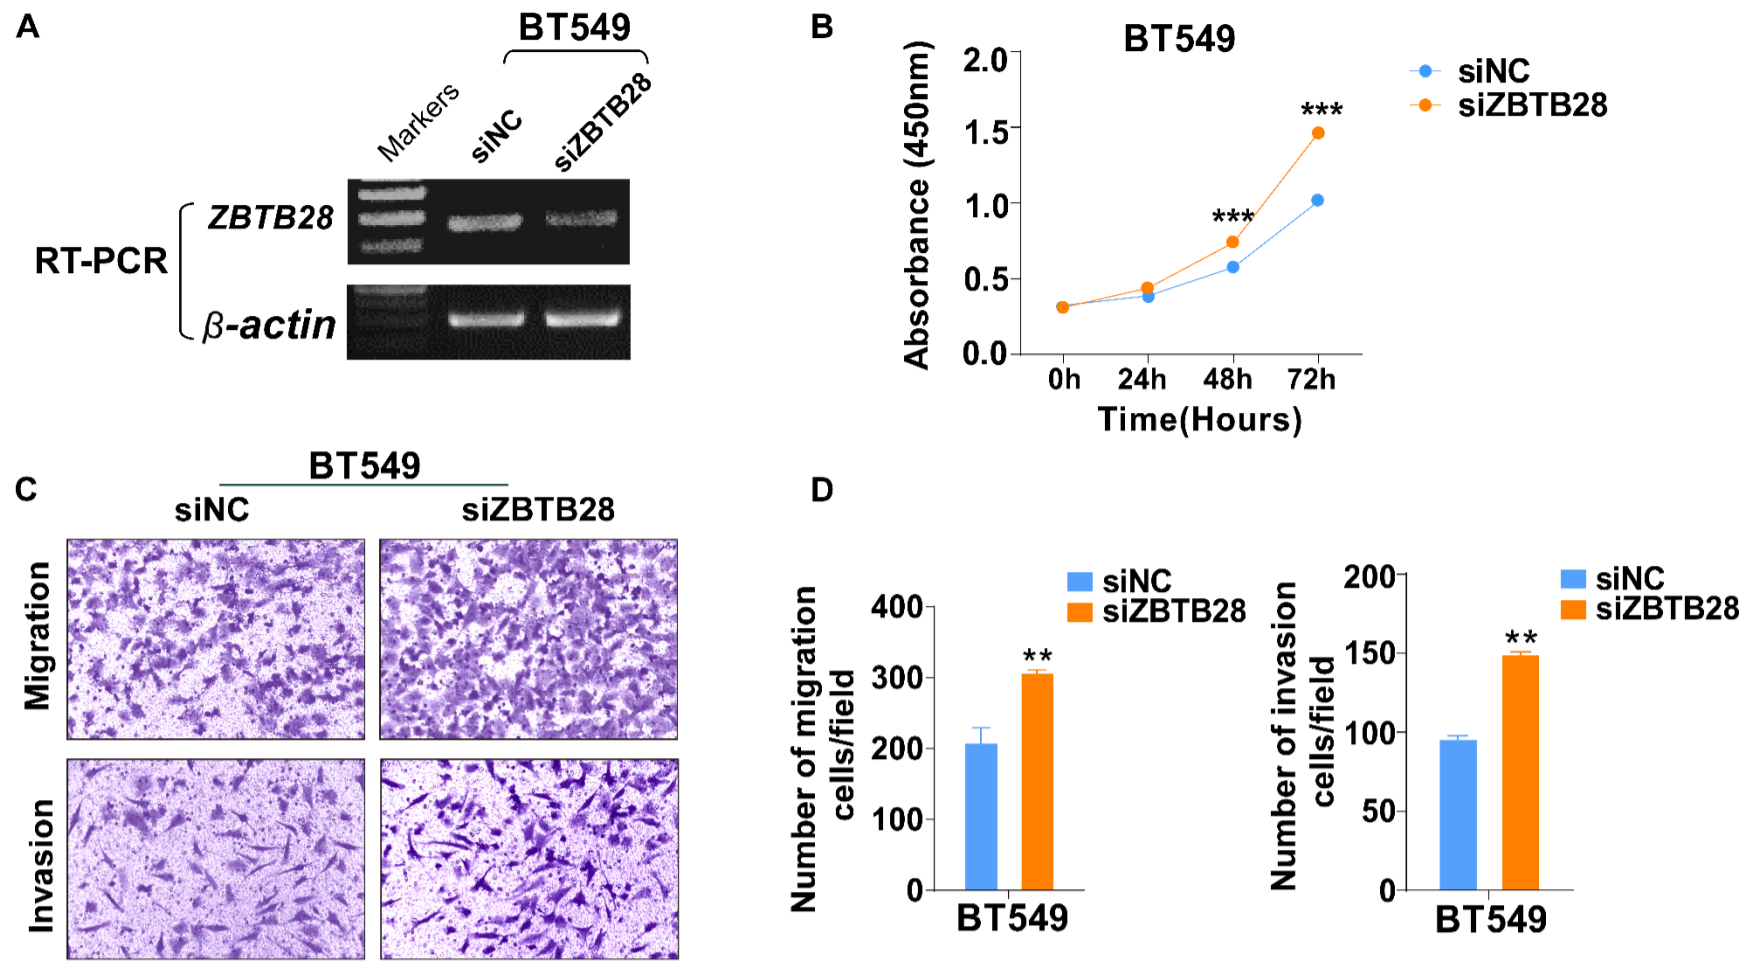



Figure S4.

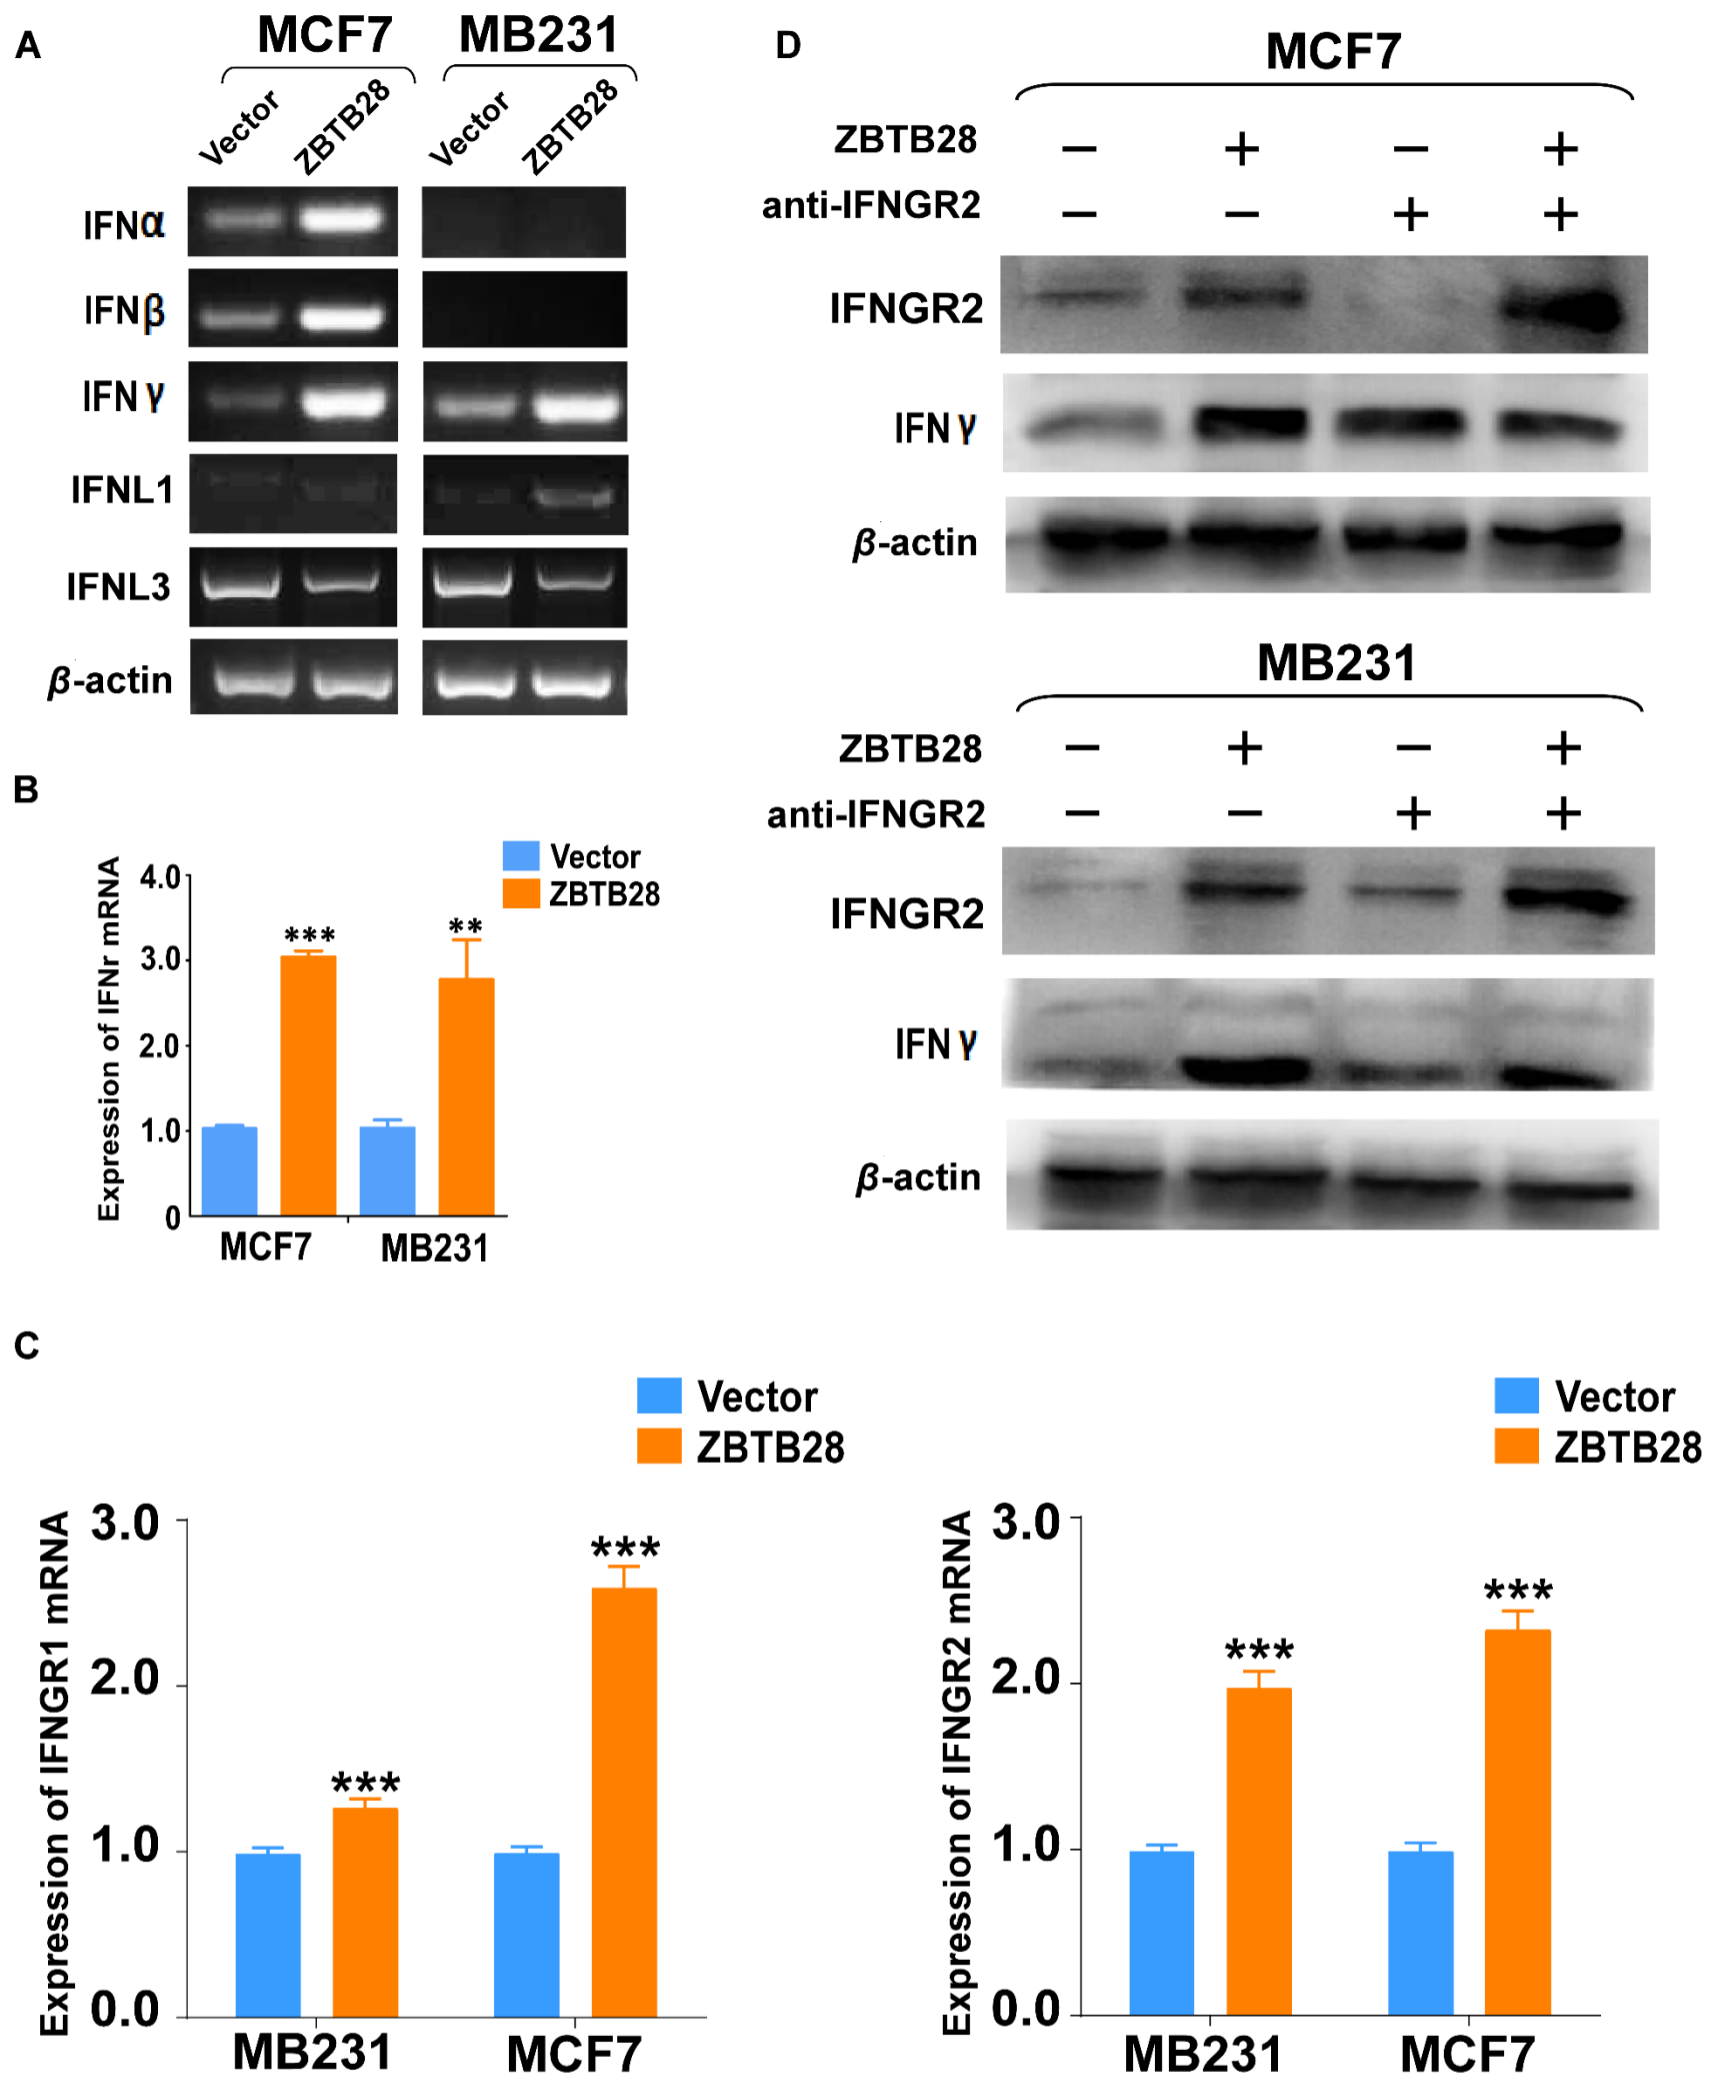

Figure S5.

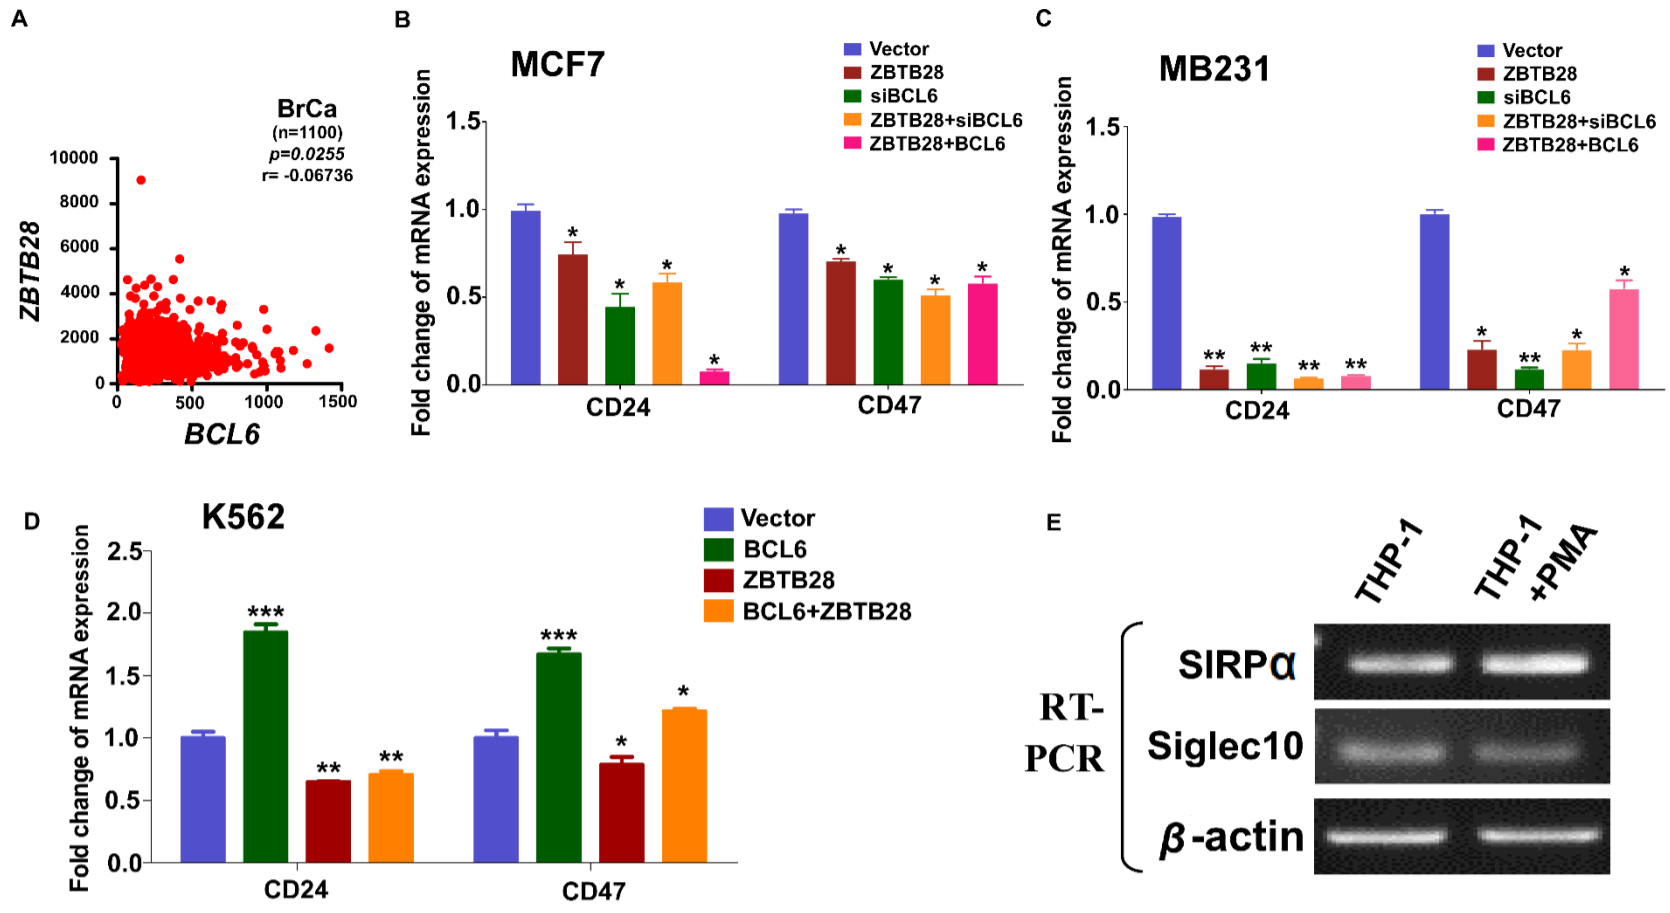

Figure S6.

A

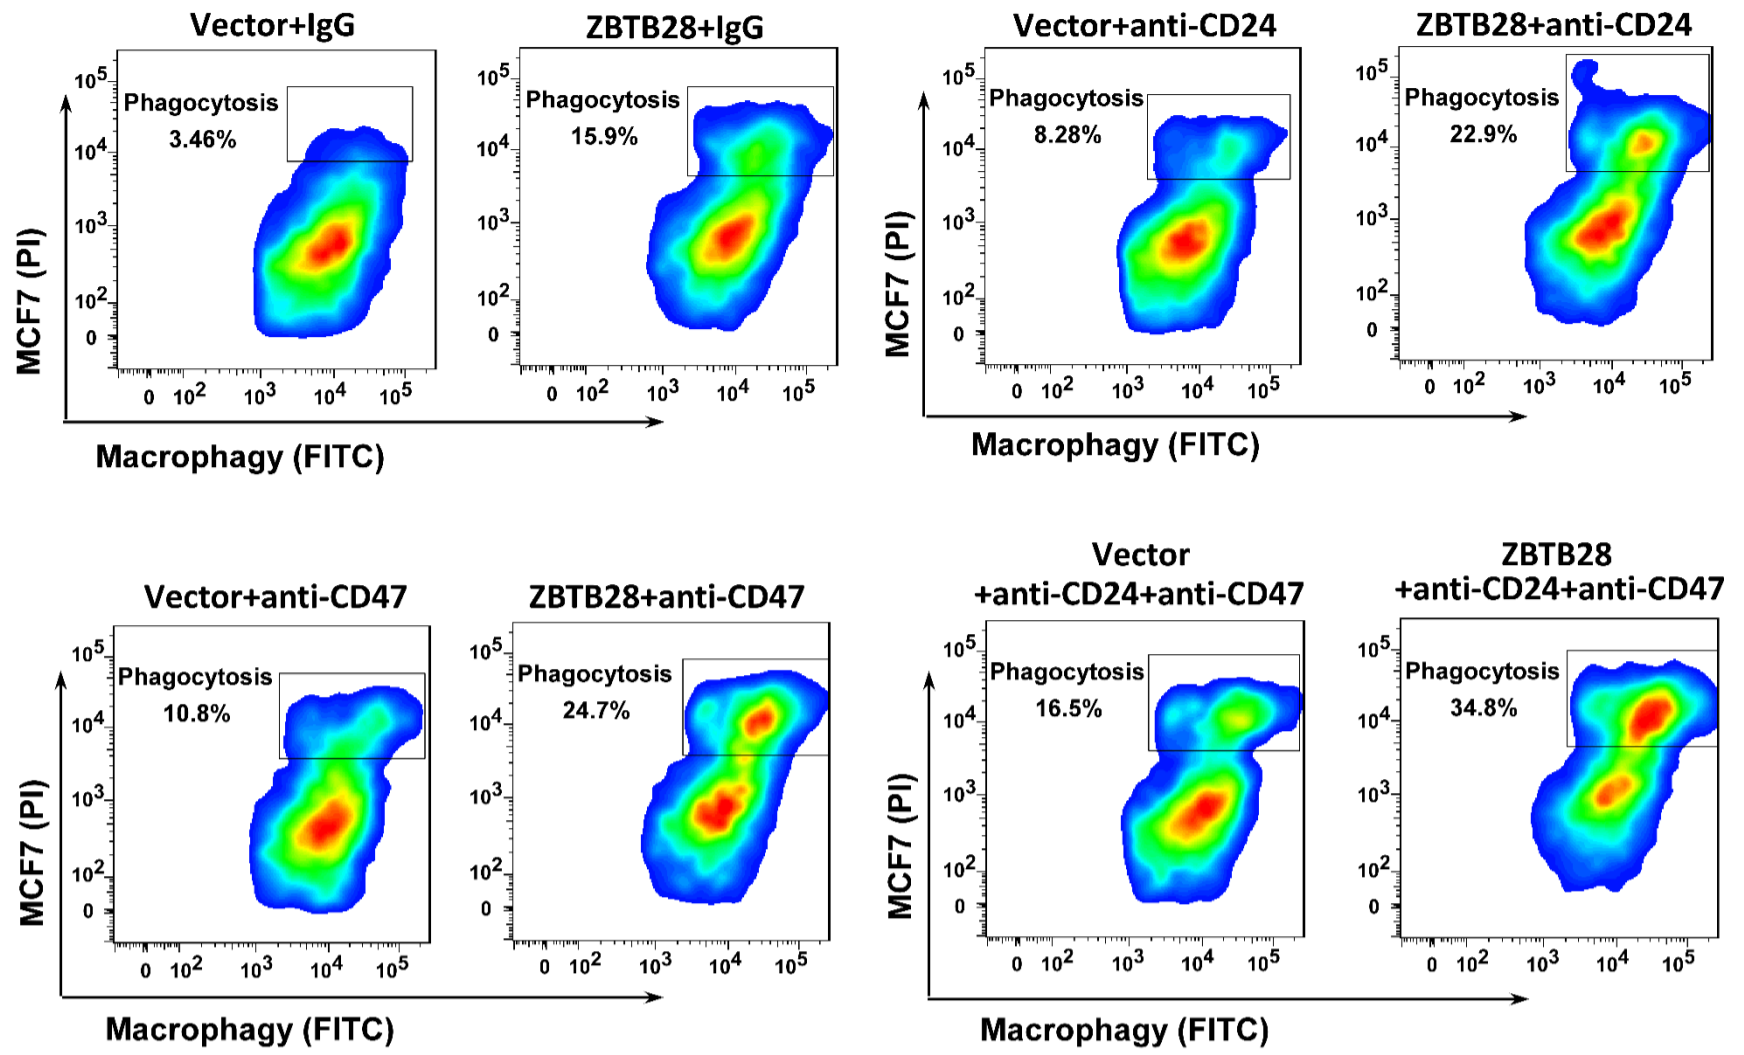

B

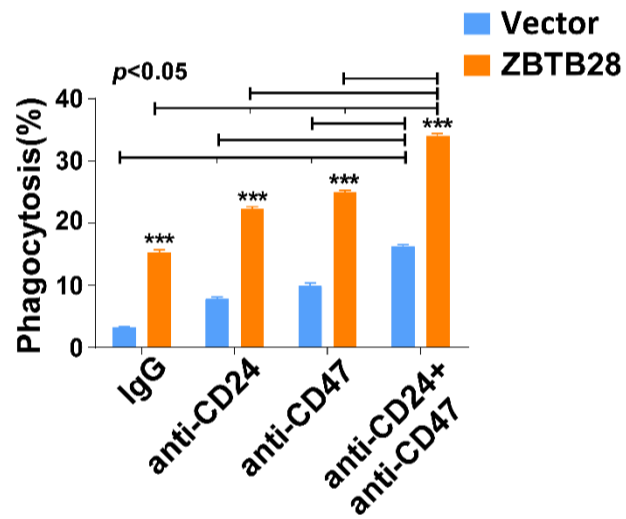

C

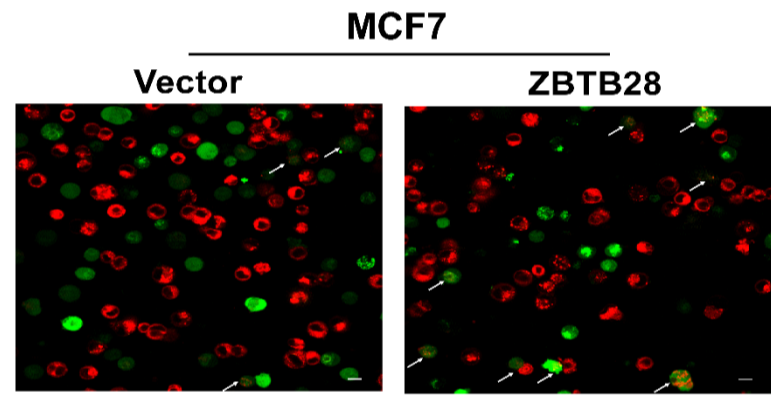

Figure S7.

A

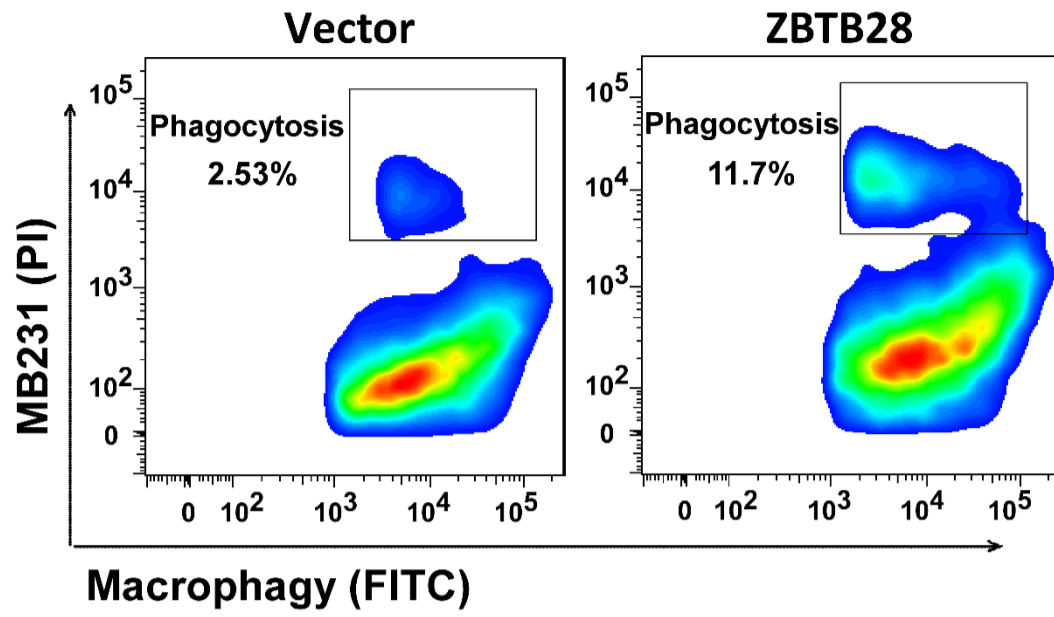

C

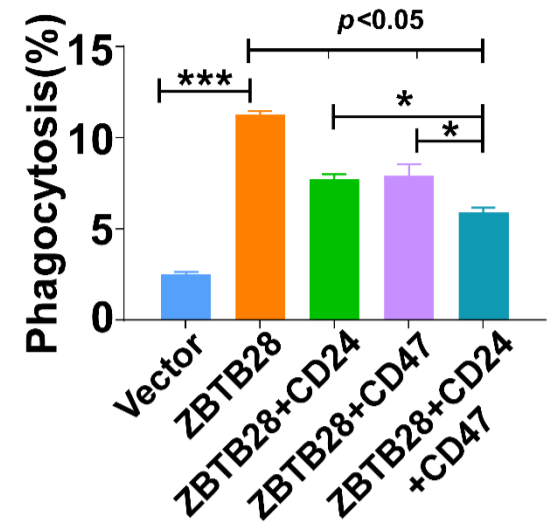

B

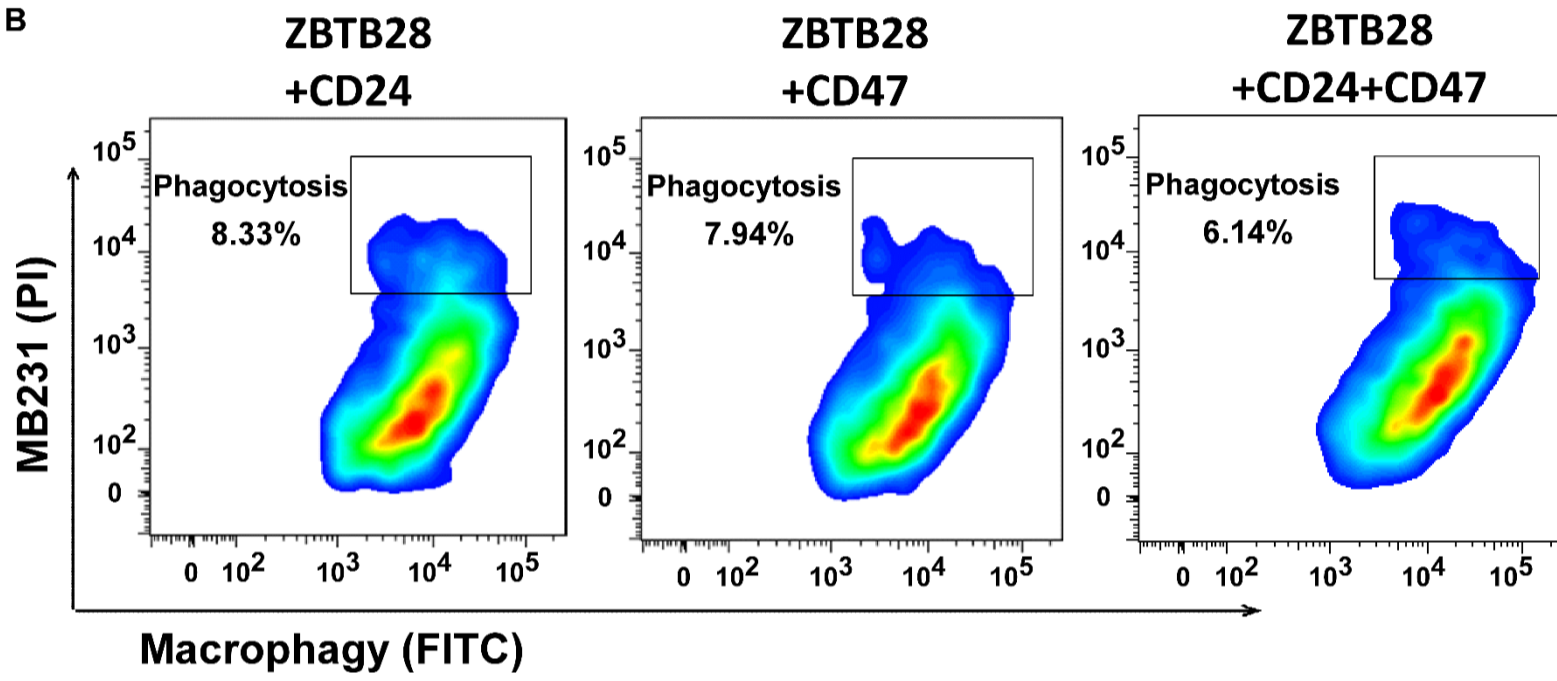

Supplement: 18_2021_4124_MOESM1_ESM.pdf [file 18_2021_4124_MOESM1_ESM.pdf]
